# Supplementary material for: Two Independently Comparative Transcriptome Analyses of Hemocytes Provide New Insights into Understanding the Disease-Resistant Characteristics of Shrimp against Vibrio Infection
Source: MDPI journal article supplement (doi:10.3390/biology12070977), 2023-07-10
Supplement: s1 [file s1]

**Table S2.** The identified DEGs from population 1

| Gene ID        | HcS1_<br>1_fpkm | HcS1_<br>2_fpkm | HcS1_<br>3_fpkm | HcD1_<br>1_fpkm | HcD1_<br>2_fpkm | HcD1_<br>3_fpkm | HcS1_mean | HcD1_mean | log2(fc) | PValue   | FDR      | Description                                                                             |
|----------------|-----------------|-----------------|-----------------|-----------------|-----------------|-----------------|-----------|-----------|----------|----------|----------|-----------------------------------------------------------------------------------------|
| ncbi_113820920 | 0.713           | 0.17            | 0.302           | 0               | 0               | 0               | 0.395     | 0.001     | -8.626   | 5.19E-05 | 3.76E-02 | PREDICTED: structural maintenance of chromosomes protein 2-like [Crassostrea gigas]     |
| MSTRG.35886    | 0.719           | 7.661           | 11.549          | 0.095           | 0               | 0.092           | 6.643     | 0.062     | -6.736   | 3.30E-05 | 2.83E-02 | hypothetical protein C7M84_023505 [Penaeus vannamei]                                    |
| ncbi_113827946 | 2.778           | 7.205           | 8.993           | 0.229           | 0.339           | 1.002           | 6.325     | 0.523     | -3.595   | 2.19E-07 | 4.18E-04 | -                                                                                       |
| ncbi_113815624 | 0.5             | 0.785           | 0.841           | 0.085           | 0.094           | 0.064           | 0.709     | 0.081     | -3.129   | 1.67E-05 | 1.54E-02 | PREDICTED: vang-like protein 2 [Hyaella azteca]                                         |
| ncbi_113827942 | 1.515           | 3.897           | 7.218           | 0.194           | 0.389           | 1.039           | 4.210     | 0.541     | -2.961   | 3.24E-06 | 3.71E-03 | -                                                                                       |
| MSTRG.1662     | 8.129           | 3.672           | 5.505           | 0.757           | 1.721           | 1.647           | 5.769     | 1.375     | -2.069   | 1.09E-06 | 1.72E-03 | APC membrane recruitment protein 1-like [Portunus trituberculatus]                      |
| MSTRG.226      | 12.58           | 16.344          | 13.035          | 6.309           | 6.224           | 7.619           | 13.986    | 6.717     | -1.058   | 3.90E-06 | 4.19E-03 | hypothetical protein EAI_04788, partial [Harpegnathos saltator]                         |
| ncbi_113812130 | 71.934          | 68.554          | 60.711          | 109.904         | 112.378         | 106.101         | 67.066    | 109.461   | 0.707    | 9.31E-05 | 4.99E-02 | PREDICTED: 4-coumarate--CoA ligase 1 isoform X1 [Strongylocentrotus purpuratus]         |
| ncbi_113824615 | 186.843         | 195.157         | 176.746         | 305.27          | 398.664         | 416.743         | 186.249   | 373.559   | 1.004    | 5.11E-08 | 1.25E-04 | spermatogonial stem-cell renewal factor [Fenneropenaeus chinensis]                      |
| ncbi_113826008 | 10.15           | 13.107          | 10.29           | 24.94           | 29.114          | 17.654          | 11.182    | 23.903    | 1.096    | 5.50E-05 | 3.78E-02 | -                                                                                       |
| MSTRG.4583     | 7.871           | 10.311          | 15.885          | 25.783          | 37.003          | 64.872          | 11.356    | 42.553    | 1.906    | 1.71E-05 | 1.54E-02 | arasin-like protein [Penaeus vannamei]                                                  |
| ncbi_113807541 | 57.456          | 54.471          | 42.108          | 54.324          | 318.286         | 220.93          | 51.345    | 197.847   | 1.946    | 6.47E-05 | 3.97E-02 | PREDICTED: immune-associated nucleotide-binding protein 13-like [Oreochromis niloticus] |
| ncbi_113806635 | 14.755          | 36.628          | 10.343          | 79.203          | 39.368          | 135.656         | 20.575    | 84.742    | 2.042    | 6.35E-05 | 3.97E-02 | -                                                                                       |
| ncbi_113817613 | 3.657           | 9.375           | 3.13            | 12.939          | 32.139          | 30.986          | 5.387     | 25.355    | 2.235    | 2.05E-06 | 2.71E-03 | PREDICTED: E3 ubiquitin-protein ligase TRIM32 [Python bivittatus]                       |
| ncbi_113824399 | 93.533          | 87.388          | 65.264          | 130.927         | 680.224         | 355.612         | 82.062    | 388.921   | 2.245    | 1.57E-06 | 2.25E-03 | Septin-4-like protein [Daphnia pulex]                                                   |
| MSTRG.19559    | 4.607           | 4.705           | 8.075           | 6.926           | 45.03           | 32.355          | 5.796     | 28.104    | 2.278    | 4.78E-05 | 3.73E-02 | hypothetical protein C7M84_014536 [Penaeus vannamei]                                    |

|                |        |         |        |         |         |         |        |         |        |          |          |                                                                                                                                   |
|----------------|--------|---------|--------|---------|---------|---------|--------|---------|--------|----------|----------|-----------------------------------------------------------------------------------------------------------------------------------|
| ncbi_113813284 | 84.025 | 124.063 | 84.648 | 272.1   | 809.682 | 415.108 | 97.579 | 498.963 | 2.354  | 4.74E-10 | 2.03E-06 | -                                                                                                                                 |
| ncbi_113825938 | 3.23   | 5.677   | 1.33   | 3.03    | 33.817  | 40.5    | 3.412  | 25.782  | 2.918  | 6.86E-05 | 4.06E-02 | PREDICTED: uncharacterized protein LOC108677898 isoform X1 [Hyalella azteca]                                                      |
| ncbi_113800624 | 27.26  | 28.997  | 17.849 | 130.533 | 228.026 | 224.836 | 24.702 | 194.465 | 2.977  | 2.56E-23 | 4.39E-19 | TUS1306 [Penaeus monodon]                                                                                                         |
| ncbi_113813611 | 0.77   | 0.151   | 0.099  | 4.366   | 2.083   | 3.166   | 0.340  | 3.205   | 3.237  | 4.78E-05 | 3.73E-02 | troponin I [Litopenaeus vannamei]                                                                                                 |
| ncbi_113805465 | 0.966  | 0.529   | 0.488  | 12.268  | 3.291   | 3.255   | 0.661  | 6.271   | 3.246  | 1.10E-06 | 1.72E-03 | myosin light chain 2 [Procambarus clarkii]                                                                                        |
| ncbi_113822686 | 1.284  | 0.165   | 0.49   | 11.51   | 4.681   | 6.559   | 0.646  | 7.583   | 3.552  | 2.58E-08 | 7.37E-05 | myosin light chain [Marsupenaeus japonicus]                                                                                       |
| ncbi_113820123 | 3.804  | 6.28    | 5.72   | 32.214  | 55.636  | 118.83  | 5.268  | 68.893  | 3.709  | 4.11E-17 | 2.35E-13 | glyceraldehyde-3-phosphate-dehydrogenase [Cherax cainii]                                                                          |
| ncbi_113819252 | 0.308  | 0       | 0.056  | 5.688   | 0.95    | 1.58    | 0.121  | 2.739   | 4.497  | 1.65E-05 | 1.54E-02 | actin 2 [Penaeus monodon]                                                                                                         |
| ncbi_113816511 | 0.06   | 0.043   | 0.012  | 0.139   | 0.556   | 2.164   | 0.038  | 0.953   | 4.636  | 2.89E-06 | 3.54E-03 | PREDICTED: myosin heavy chain, muscle-like isoform X4 [Hyalella azteca]                                                           |
| MSTRG.15220    | 0.068  | 0.262   | 0.215  | 10.783  | 0.38    | 10.883  | 0.182  | 7.349   | 5.338  | 1.10E-07 | 2.36E-04 | Retrovirus-related Pol polyprotein from transposon 297,Retrovirus-related Pol polyprotein from transposon 17.6 [Mytilus coruscus] |
| ncbi_113823394 | 0      | 0       | 0.046  | 0.042   | 1.897   | 1.772   | 0.015  | 1.237   | 6.334  | 9.14E-05 | 4.99E-02 | Protein CBG05275 [Caenorhabditis briggsae]                                                                                        |
| ncbi_113807016 | 0      | 0.015   | 0      | 0.046   | 0.229   | 1.029   | 0.005  | 0.435   | 6.442  | 7.18E-05 | 4.11E-02 | PREDICTED: myosin heavy chain, muscle-like isoform X8 [Hyalella azteca]                                                           |
| ncbi_113818166 | 0      | 0       | 0      | 0.123   | 0.274   | 0.871   | 0.001  | 0.423   | 8.723  | 5.26E-05 | 3.76E-02 | -                                                                                                                                 |
| ncbi_113823028 | 0      | 0       | 0      | 1.46    | 5.039   | 2.399   | 0.001  | 2.966   | 11.534 | 3.25E-09 | 1.11E-05 | PREDICTED: alpha-(1,6)-fucosyltransferase-like [Parasteatoda tepidariorum]                                                        |
| ncbi_113829244 | 0      | 0       | 0      | 9.114   | 7.289   | 14.557  | 0.001  | 10.320  | 13.333 | 2.70E-20 | 2.32E-16 | PREDICTED: MAM and LDL-receptor class A domain-containing protein 2-like [Hyalella azteca]                                        |
