# Supplementary material for: Two Independently Comparative Transcriptome Analyses of Hemocytes Provide New Insights into Understanding the Disease-Resistant Characteristics of Shrimp against Vibrio Infection
Source: MDPI journal article supplement (doi:10.3390/biology12070977), 2023-07-10
Supplement: s1 [file s1]

**Table S1.** Information of primers used in the present study

| Gene ID        | Gene name                                                     | Primer sequence                                        | Product size (bp) | Annealing temperature |
|----------------|---------------------------------------------------------------|--------------------------------------------------------|-------------------|-----------------------|
| /              | PirA                                                          | F: GGTGACCAGACCTGCTTTGAG<br>R: CCAGCTAGGATAACCGTAACATG | 112               | 60                    |
| /              | 16S rDNA                                                      | F: AGAGTTTGATCCTGGCTCAG<br>R: GGTTACCTTGTTACGACTT      | 1400              | 58                    |
| /              | 18S rRNA                                                      | F: TATACGCTAGTGGAGCTGGAA<br>R: GGGGAGGTAGTGACGAAAAAT   | 136               | 55                    |
| ncbi_113815990 | dihydropyrimidinase-like isoform X3                           | F: AGGGACAGGGCTAATGCTC<br>R: GGTTGACACCTCCACTTCTA      | 163               | 56                    |
| ncbi_113825784 | prohibitin                                                    | F: TAAAGGCTGTTGTGGCTCG<br>R: CCGAAGGTCAAATGGGTAA       | 148               | 56                    |
| ncbi_113824882 | iroquois-class homeodomain protein IRX-2-like                 | F: CTCCTCGTCCAGCACAGAC<br>R: GGGTAAGCATTGGGTAGCG       | 165               | 57                    |
| ncbi_113829145 | diacylglycerol kinase 1                                       | F: CGAGGAGGGATGACCACTA<br>R: ACGCAGGTTTGCTGAAGTG       | 107               | 56                    |
| ncbi_113813376 | tubulin alpha-3 chain-like                                    | F: CTACCGCCTTCTGTTCCACC<br>R: TCCACGATTTCTTACCGATT     | 102               | 56                    |
| ncbi_113819252 | actin                                                         | F: TGTGATGGTCGGTATGGGT<br>R: ATGAGTACGACGAGTCTGG       | 165               | 55                    |
| ncbi_113813611 | troponin I                                                    | F: ACAATGAGCTCCGTGTTGC<br>R: TTCTATTACTACGTCTCGGATG    | 100               | 57                    |
| ncbi_113829244 | MAM and LDL-receptor class A domain-containing protein 2-like | F: GGCTGGGAATGCGTG GTA<br>R: GCCCTGGATGATGGAAAT        | 133               | 55                    |
| ncbi_113820123 | glyceraldehyde-3-phosphate-dehydrogenase                      | F: GACATCCGCTCCTCCATCT<br>R: CCCTCCCTTCCTCACATCC       | 185               | 56                    |
| ncbi_113807541 | immune-associated nucleotide-binding protein 13-like          | F: AGCTGGTAAGACTAGGCTGT<br>R: CTCATCTACCAGCAACCC       | 166               | 56                    |
| ncbi_113823028 | alpha-(1,6)-fucosyltransferase-like                           | F: AATGGAGTTTAGCACGGGTAC<br>R: TTTGGGTTTGTCCGTGTCG     | 139               | 57                    |
