# Supplementary material for: Two Independently Comparative Transcriptome Analyses of Hemocytes Provide New Insights into Understanding the Disease-Resistant Characteristics of Shrimp against Vibrio Infection
Source: MDPI journal article supplement (doi:10.3390/biology12070977), 2023-07-10
Supplement: s1 [file s1]

**Table S3.** The identified DEGs from population 2

| Gene ID        | HcS2-<br>1_fpkm | HcS2-<br>2_fpkm | HcS2-<br>3_fpkm | HcS2-<br>4_fpkm | HcD2-<br>1_fpkm | HcD2-<br>2_fpkm | HcD2-<br>3_fpkm | HcD2-<br>4_fpkm | HcS2_mean | HcD2_mean | log2(fc) | PValue   | FDR      | Description                                                                   |
|----------------|-----------------|-----------------|-----------------|-----------------|-----------------|-----------------|-----------------|-----------------|-----------|-----------|----------|----------|----------|-------------------------------------------------------------------------------|
| ncbi_113815990 | 10.213          | 12.548          | 16.482          | 5.415           | 3.158           | 4.893           | 2.051           | 3.749           | 11.165    | 3.463     | -1.689   | 3.10E-06 | 1.84E-02 | PREDICTED: dihydropyrimidinase-like isoform X3 [Hyaella azteca]               |
| ncbi_113825784 | 12.613          | 19.227          | 9.54            | 13.806          | 7.178           | 3.88            | 4.288           | 4.886           | 13.797    | 5.058     | -1.448   | 1.37E-05 | 4.73E-02 | prohibitin [Litopenaeus vannamei]                                             |
| ncbi_113824882 | 4.686           | 5.927           | 5.405           | 4.87            | 2.134           | 1.596           | 2.681           | 1.827           | 5.222     | 2.060     | -1.342   | 3.20E-06 | 1.84E-02 | PREDICTED: iroquois-class homeodomain protein IRX-2-like [Limulus polyphemus] |
| ncbi_113829145 | 6.873           | 7.048           | 5.232           | 6.205           | 2.391           | 3.467           | 3.064           | 1.706           | 6.340     | 2.657     | -1.255   | 9.34E-06 | 4.02E-02 | PREDICTED: diacylglycerol kinase 1 [Ceratosolen solmsi marchali]              |
| ncbi_113813376 | 1.746           | 1.442           | 1.167           | 1.348           | 2.718           | 6.186           | 12.265          | 6.076           | 1.426     | 6.811     | 2.256    | 8.27E-07 | 1.42E-02 | PREDICTED: tubulin alpha-3 chain-like [Hyaella azteca]                        |
